# Supplementary material
Source: PubMed Central journal article supplement (PMC8115359)
Supplement: 1242.pdf [file 1242.pdf]

## **Online Supplemental Material**

### **Online Materials and Methods**

#### ***Neuroimaging studies and protocols***

All patients presented at least one brain MRI for review (median 4 studies, range 1-12). Median age at first MRI was 7.8 years (range 1.4-20.8 years). Longitudinal studies were available in 10/12 cases (median imaging follow-up time of 5.5 years; range: 11 months-13.9 years). Patients were scanned on 1.5T or 3T MR units with different imaging protocols, all including DWI, T1WI, T2WI and FLAIR sequences and underwent at least one angiographic study, i.e. CTA, MRA and/or DSA (median 3, range 1-10). T2\*-weighted sequences were available in 8/12 patients. Contrast material was injected in 10/12 subjects, including twenty-four studies with additional post-contrast fat sat T1WI and/or black-blood vessel-wall imaging sequences. Finally, arterial spin labelling studies were performed in 7/12 patients (range:1-5). In total, 59 brain MRI, 3 spinal MRI, 48 MRA, 9 head CT scans, 2 CTA and 4 DSA studies were analyzed.

## Online Tables

**Online Table 1.** Clinical and genetic features and treatment response

|                                              | #1                                   | #2                              | #3                    | #4                     | #5                   | #6                             | #7                             | #8                                   | #9                 | #10                      | #11                          | #12                              |
|----------------------------------------------|--------------------------------------|---------------------------------|-----------------------|------------------------|----------------------|--------------------------------|--------------------------------|--------------------------------------|--------------------|--------------------------|------------------------------|----------------------------------|
| <b>Sex</b>                                   | M                                    | M                               | M                     | F                      | F                    | F                              | F                              | M                                    | M                  | F                        | M                            | F                                |
| <b>Current age</b>                           | 20Y                                  | 12Y                             | 13Y                   | 11Y                    | 18Y                  | 40Y                            | 22Y                            | 17Y                                  | 25Y                | 31Y                      | 24Y                          | 25Y                              |
| <b>Age at symptoms onset</b>                 | 2Y                                   | 9mo                             | 6mo                   | 3mo                    | 5Y                   | 5Y                             | 1Y                             | 1Y                                   | 7Y                 | 3mo                      | 3Y                           | 20mo                             |
| <b>Age at genetic diagnosis</b>              | 15Y                                  | 7Y                              | 9Y                    | 5Y                     | 17Y                  | 35Y                            | 17Y                            | 13Y                                  | 19Y                | 16Y                      | 14Y                          | 20Y                              |
| <b>ADA2 mutation</b>                         | R312X/<br>E328D                      | R312X<br>E328D                  | T360A<br>T360A        | 22q11.1<br>duplication | G47R<br>G47R         | T360A<br>T360A                 | T360A<br>T360A                 | L249P<br>P344L                       | L249P<br>T360A     | T360A/ T360A             | G47V<br>S479P                | G47V<br>S479P                    |
| <b>Origin</b>                                | Italian                              | Italian                         | Italian               | Italian                | Asian                | Italian                        | Italian                        | Italian                              | Italian            | Italian                  | Italian                      | Italian                          |
| <b>Family history</b>                        | Yes<br> <br>(brother: patient<br>#2) | Yes<br>(brother: patient<br>#1) | No                    | No                     | Unknown<br>(adopted) | Yes<br>(sister:<br>patient #7) | Yes<br>(sister:<br>patient #6) | Yes<br>(brother)                     | No                 | Yes<br>(uncle & brother) | Yes<br>(sister: patient #12) | Yes<br>(brother: patient<br>#11) |
| <b>Endogamy*</b>                             | Yes                                  | Yes                             | Yes                   | No                     | Unknown<br>(adopted) | No                             | No                             | No                                   | No                 | No                       | Yes                          | No                               |
| <b>Deficiency of serum<br/>ADA2 activity</b> | Yes                                  | Yes                             | Yes                   | Yes                    | Yes                  | Yes                            | Yes                            | Yes                                  | NA                 | NA                       | Yes                          | Yes                              |
| <b>Clinical presentation</b>                 | Livedo<br>reticularis                | Fever, livedo<br>reticularis    | L facial<br>paralysis | Livedo<br>reticularis  | Skin<br>vasculitis   | Fever,<br>arthralgia           | Skin rash                      | Fever, arthralgia,<br>abdominal pain | Fever,<br>seizures | Fever                    | Vertigo                      | Ataxia                           |

|                                                     |                                               |                       |                                    |                                 |                                 |                                                       |                                          |                    |                                 |                                             |                                                       |                                                         |         |
|-----------------------------------------------------|-----------------------------------------------|-----------------------|------------------------------------|---------------------------------|---------------------------------|-------------------------------------------------------|------------------------------------------|--------------------|---------------------------------|---------------------------------------------|-------------------------------------------------------|---------------------------------------------------------|---------|
| <b>Clinical course</b>                              | Chronic                                       | Chronic               | Chronic                            | Chronic                         | Chronic                         | Chronic                                               | Chronic                                  | Chronic            | Chronic                         | Recurrent                                   | Chronic                                               | Chronic                                                 | Chronic |
| <b>Biopsy findings</b>                              | PAN (skin)                                    | PAN (bowel)           | NA                                 | NA                              | NA                              | PAN (skin)                                            | PAN (skin)                               | NA                 | Necrotizing vasculitis (bowel)  | Leucocytoclastic vasculitis/<br>PAN (skin)  | NA                                                    | Leucocytoclastic vasculitis/<br>PAN (skin/bowel)        |         |
| <b>Fever</b>                                        | Yes                                           | Yes                   | Yes                                | Yes                             | No                              | Yes                                                   | Yes                                      | Yes                | Yes                             | Yes                                         | No                                                    | No                                                      |         |
| <b>Elevation of acute phase reactants</b>           | Yes                                           | Yes                   | Yes                                | Yes                             | Yes                             | Yes                                                   | Yes                                      | Yes                | Yes                             | Yes                                         | Yes                                                   | Yes                                                     |         |
| <b>Immunodeficiency</b>                             | Hypogammaglobulinemia                         | Hypogammaglobulinemia | No                                 | Hypogammaglobulinemia           | No                              | No                                                    | No                                       | No                 | No                              | No                                          | Hypogammaglobulinemia                                 | Hypogammaglobulinemia, recurrent upper airway infection |         |
| <b>Arterial hypertension</b>                        | Yes                                           | Yes                   | Yes                                | Yes                             | Yes                             | Yes                                                   | Yes                                      | Yes                | Yes                             | No                                          | Yes                                                   | Yes                                                     |         |
| <b>Dermatological findings</b>                      | Livedo reticularis, subcutaneous nodules      | Livedo reticularis    | Livedo reticularis                 | Livedo reticularis              | Livedo reticularis, skin ulcers | Livedo reticularis, subcutaneous nodules, skin ulcers | Livedo reticularis, skin ulcers          | Livedo reticularis | Livedo reticularis, skin ulcers | Livedo reticularis                          | Livedo reticularis, subcutaneous nodules, skin ulcers | Livedo reticularis, subcutaneous nodules                |         |
| <b>Presenting neurological symptoms/signs (age)</b> | Diplopia, anisocoria, ptosis, strabismus (6Y) | R hemiplegia (17mo)   | L facial paralysis, diplopia (6mo) | R Hemiparesis, R blindness (4Y) | L hemiparesis, coma (10Y)       | L hemiparesis (12Y)                                   | Focal sensitive-motor abnormalities (2Y) | Seizures (8Y)      | Seizures (7Y)                   | Diplopia, palpebral ptosis, strabismus (7Y) | Vertigo (3Y)                                          | Ataxia (20mo)                                           |         |

|                                                                  |                              |                             |                       |                      |                    |                                |                            |                                                            |                                   |                             |                      |                      |
|------------------------------------------------------------------|------------------------------|-----------------------------|-----------------------|----------------------|--------------------|--------------------------------|----------------------------|------------------------------------------------------------|-----------------------------------|-----------------------------|----------------------|----------------------|
| <b>Age at first documented stroke</b>                            | 6Y                           | 17mo                        | 6Y                    | 4Y                   | 10Y                | 12Y                            | 2Y                         | NA                                                         | NA                                | 7Y                          | 9Y                   | 12Y                  |
| <b>CNS recurrences</b>                                           | Yes                          | Yes                         | Yes                   | Yes                  | Yes                | Yes                            | Yes                        | No                                                         | No                                | Yes                         | No                   | Yes                  |
| <b>Sensorineural Hearing Loss</b>                                | No                           | No                          | Yes                   | No                   | No                 | No                             | No                         | Yes                                                        | No                                | No                          | No                   | No                   |
| <b>Cranial nerve involvement</b>                                 | III nerve palsy              | No                          | III + VII nerve palsy | Optic nerve neuritis | No                 | No                             | No                         | No                                                         | No                                | III nerve palsy             | No                   | No                   |
| <b>Other relevant clinical findings</b>                          | Arthralgia                   | Diarrhea, bowel perforation | Myocarditis           | Myocarditis          | Arthralgia         | Arthralgia, Hepatosplenomegaly | Arthralgia                 | Episcleritis<br>Diarrhea,<br>abdominal pain,<br>arthralgia | Bowel invagination,<br>arthralgia | No                          | Colitis              | Colitis              |
| <b>Current immunosuppressive treatment (age at introduction)</b> | Etanercept (9Y)              | Etanercept (4Y)             | Etanercept (7Y)       | Etanercept (4.5Y)    | Etanercept (16.5Y) | Thalidomide (13Y)              | Thalidomide (13Y)          | Etanercept (13Y)                                           | Etanercept (14Y)                  | Thalidomide (14Y)           | Etanercept (18Y)     | Etanercept (20Y)     |
| <b>Clinical response to current treatment</b>                    | Complete                     | Complete                    | Complete              | Complete             | Complete           | Complete                       | Complete                   | Complete                                                   | Complete                          | Complete                    | Complete             | Complete             |
| <b>Previous immunosuppressive treatment(s)</b>                   | Thalidomide + CPP + steroids | Thalidomide+ steroids       | Steroids              | Anakinra + steroids  | Steroids           | MTX + AZA + MPL + steroids     | CPP + AZA + MPL + steroids | Steroids                                                   | CPP + MPL + steroids              | MTX + infliximab + steroids | AZA + MPL + steroids | CPP + MPL + steroids |
| <b>Age at last clinical follow-up</b>                            | 20Y                          | 13Y                         | 13Y                   | 12Y                  | 19Y                | 38Y                            | 21Y                        | 17Y                                                        | 22Y                               | 17Y                         | 24Y                  | 25Y                  |

**Legend:** AZA- Azathioprine, CPP- Cyclophosphamide, F- Female, L- Left, M- Male, mo- months, MPL- Mycophenolate, MTX- Methotrexate, NA- Non applicable, PAN- Polyarteritis nodosa, Y- Years

\* patients without a clear consanguinity but whose parents have their ancestor in the same small village

**Online Table 2.** Neurological and neuroimaging characteristics at first available MRI and at follow-up

| Pt                                        | #1                                                    | #2                       | #3                     | #4                                   | #5                                            | #6                                                                                             | #7                                           | #8       | #9       | #10                     | #11                                                         | #12                                                                      |
|-------------------------------------------|-------------------------------------------------------|--------------------------|------------------------|--------------------------------------|-----------------------------------------------|------------------------------------------------------------------------------------------------|----------------------------------------------|----------|----------|-------------------------|-------------------------------------------------------------|--------------------------------------------------------------------------|
| <b>Age at first available brain MRI</b>   | 6Y + 1m                                               | 17mo                     | 6Y + 2mo               | 5Y + 10mo                            | 16Y + 6mo                                     | 20Y + 2mo                                                                                      | 3Y + 3mo                                     | 7Y + 7mo | 7Y + 7mo | 19Y + 1mo               | 18Y + 4mo                                                   | 20Y + 2mo                                                                |
| <b>Ischemic stroke</b>                    | Yes                                                   | Yes                      | Yes                    | Yes                                  | No                                            | Yes                                                                                            | Yes                                          | No       | No       | Yes                     | Yes                                                         | Yes                                                                      |
| - <b>Multiple lesions</b>                 | Yes                                                   | No                       | Yes                    | Yes                                  |                                               | Yes                                                                                            | Yes                                          |          |          | No                      | Yes                                                         | Yes                                                                      |
| - <b>Circulation(s) involved</b>          | A & P                                                 | A                        | P                      | A & P                                |                                               | A                                                                                              | A & P                                        |          |          | P                       | A                                                           | A & P                                                                    |
| - <b>Location and side</b>                | L cerebral peduncle (2), L nucleo-capsular region (2) | L nucleo-capsular region | R midbrain (3), R pons | L thalamus, R nucleo-capsular region |                                               | Bilateral nucleo-capsular region (4), multiple periventricular and deep WM lesions, isthmus CC | L cerebral peduncle (2), L centrum semi-oval |          |          | R cerebral peduncle (1) | L nucleo-capsular region, R fronto-parieto-occipital region | Bilateral thalamus (5), R midbrain, bilateral nucleo-capsular region (3) |
| - <b>At least one acute (DWI+) lesion</b> | Yes                                                   | No                       | No                     | Yes                                  |                                               | NA                                                                                             | NA                                           |          |          | NA                      | No                                                          | No                                                                       |
| <b>Hemorrhagic stroke</b>                 | Yes- L temporal lobar hemorrhage                      | No                       | No                     | No                                   | Yes - R fronto-parietal lobar hemorrhage, SAH | No                                                                                             | No                                           | No       | No       | No                      | No                                                          | No                                                                       |

|                                                          |                                                                              |           |           |                                 |                                                            |                  |                                                                    |                              |           |            |           |                                 |
|----------------------------------------------------------|------------------------------------------------------------------------------|-----------|-----------|---------------------------------|------------------------------------------------------------|------------------|--------------------------------------------------------------------|------------------------------|-----------|------------|-----------|---------------------------------|
|                                                          |                                                                              |           |           |                                 |                                                            |                  |                                                                    |                              |           |            |           |                                 |
| <b>Focal areas of susceptibility effect on T2*WI/SWI</b> | Yes- R parietal region                                                       | No        | No        | Yes- R putamen                  | Yes- superficial siderosis                                 | NA               | NA                                                                 | NA                           | NA        | No         | Yes- IPF  | No                              |
| <b>Qualitative findings of diffuse brain atrophy</b>     | No                                                                           | No        | Yes, mild | No                              | No                                                         | No               | No                                                                 | No                           | Yes, mild | Yes, mild  | Yes, mild | Yes, mild                       |
| <b>Other neuroimaging abnormalities</b>                  | No                                                                           | No        | No        | Yes- mild atrophy R optic nerve | Yes- wallerian degeneration R CST                          | No               | No                                                                 | Yes- PRES                    | Yes- PRES | No         | No        | Yes- hydromyelic cavity (D7-D9) |
| <b>Number of available FU brain MRI</b>                  | 9                                                                            | 6         | 6         | 11                              | 4                                                          | 2                | 6                                                                  | 0                            | 0         | 1          | 1         | 1                               |
| <b>Age at last available brain MRI</b>                   | 19Y + 1mo                                                                    | 12Y + 2mo | 13 Y      | 10Y + 11mo                      | 18Y + 6mo                                                  | 16Y + 11mo       | 26Y + 6mo                                                          | NA                           | NA        | 20Y        | 23Y + 8mo | 24Y + 10mo                      |
| <b>New ischemic lesions at FU</b>                        | Yes                                                                          | No        | No        | Yes                             | No                                                         | Yes              | Yes                                                                | NA                           | NA        | Yes        | No        | No                              |
| - <b>Circulation</b>                                     | A & P                                                                        |           |           | P                               | A & P                                                      | Spinal           | A & P                                                              |                              |           | P          |           |                                 |
| - <b>Location</b>                                        | Bilateral periaqueductal, L mesencephalon, nucleocapsular region, L thalamus |           |           | R thalamus (2)                  | R semioval centrum, L pons, L inferior cerebellar peduncle | Spinal cord (C4) | Periventricular region bilaterally, L inferior cerebellar peduncle |                              |           | R midbrain |           |                                 |
| <b>Perivascular enhancing tissue</b>                     | Yes- IPF                                                                     | No        | Yes- IPF  | Yes- IPF                        | No                                                         | No               | NA                                                                 | Yes- L crural cistern, L IAC | NA        | No         | No        | No                              |
| <b>Brain MRA/DSA/CTA findings</b>                        | N                                                                            | N         | N         | Reversible stenosis L PCoA      | Two intracranial aneurysms                                 | N                | N                                                                  | N                            | NA        | N          | N         | N                               |

|  |  |  |  |  |                                           |  |  |  |  |  |  |  |
|--|--|--|--|--|-------------------------------------------|--|--|--|--|--|--|--|
|  |  |  |  |  | (branch of<br>ACoA<br>complex, L<br>SCA)* |  |  |  |  |  |  |  |
|--|--|--|--|--|-------------------------------------------|--|--|--|--|--|--|--|

**Legend:** A- Anterior, ACoA- Anterior communicating artery, CC- Corpus callosum, CST- Corticospinal tract, FU- Follow-up, GM- Gray matter, IAC- Internal auditory canal, IPF- Interpeduncular fossa, L- Left, mo- Months, N- Normal, no- Number, NA- Non applicable, P- Posterior, PCoA- Posterior communicating artery, PRES- Posterior reversible encephalopathy syndrome, R- Right, SAH- Subarachnoid acute hemorrhage, SCA- Superior cerebellar artery, Y- Years  
 \*Also history of a right middle meningeal artery ruptured aneurysm surgically treated during evacuation of a lobar hematoma

## Online Figure Legends

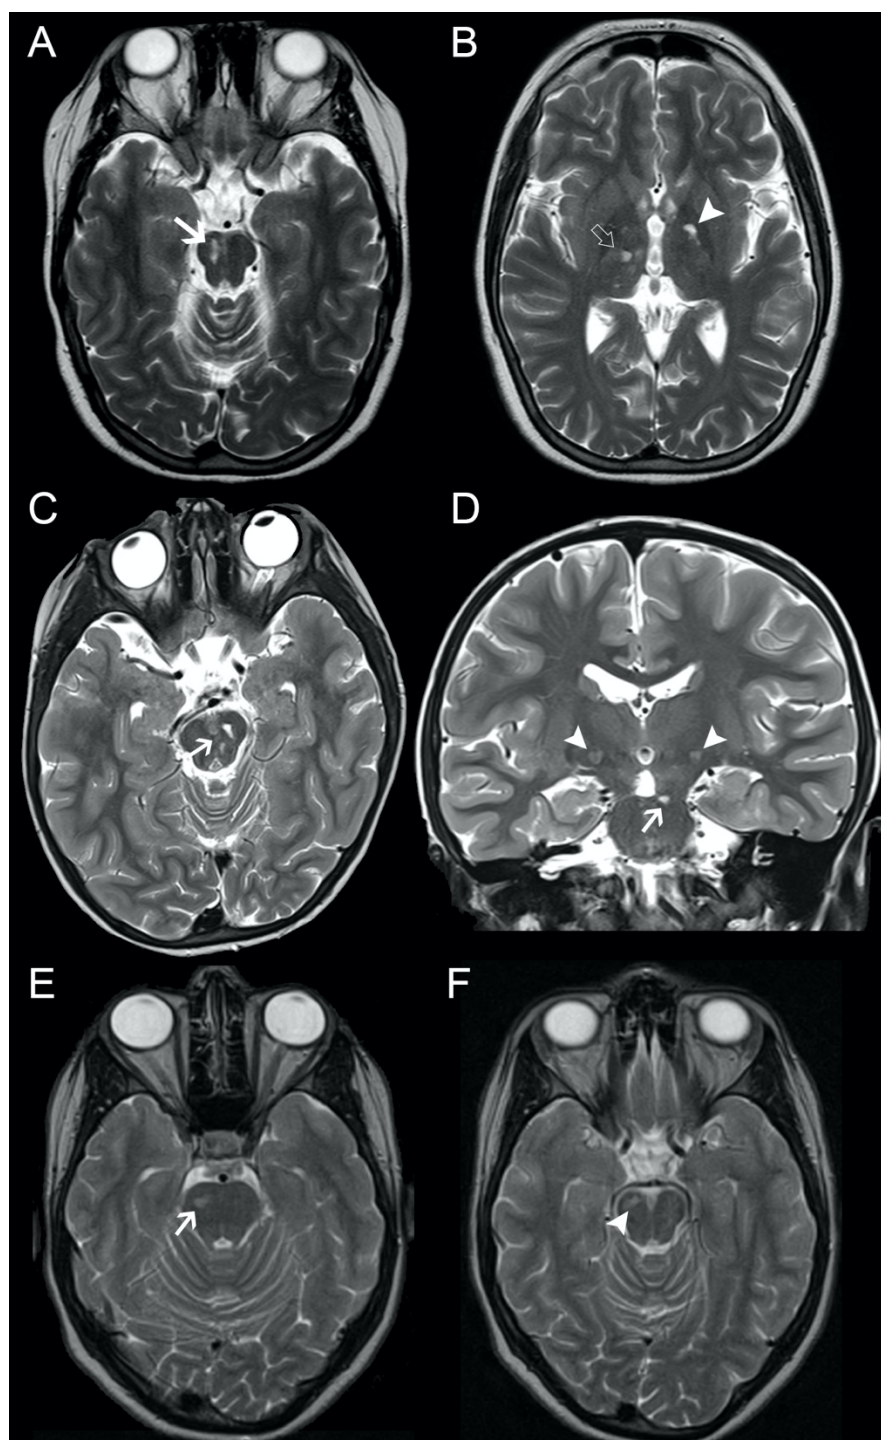

**Online Fig 1.** Chronic brain ischemic infarcts in three patients with adenosine deaminase 2 deficiency. Axial T2WI of patient #12 at 18.2 years of age (A,B) demonstrates multiple chronic lacunar ischemic infarcts distributed in both the anterior and posterior cerebral territories, namely in the right ponto-mesencephalic junction (arrow), left globus pallidus (arrowhead) and right thalamus



(open arrow). Axial (C) and coronal (D) T2WI of patient #3 at 6.2 years of age depicts multiple old lacunar infarcts in the left cerebral peduncle (arrows) and thalami bilaterally (arrowheads). Axial T2WI (E,F) of patient #10 at 19.9 years of age (D,E) shows chronic ischemic lesions in the right pontine protuberance (arrow) and cerebral peduncle (arrowhead).

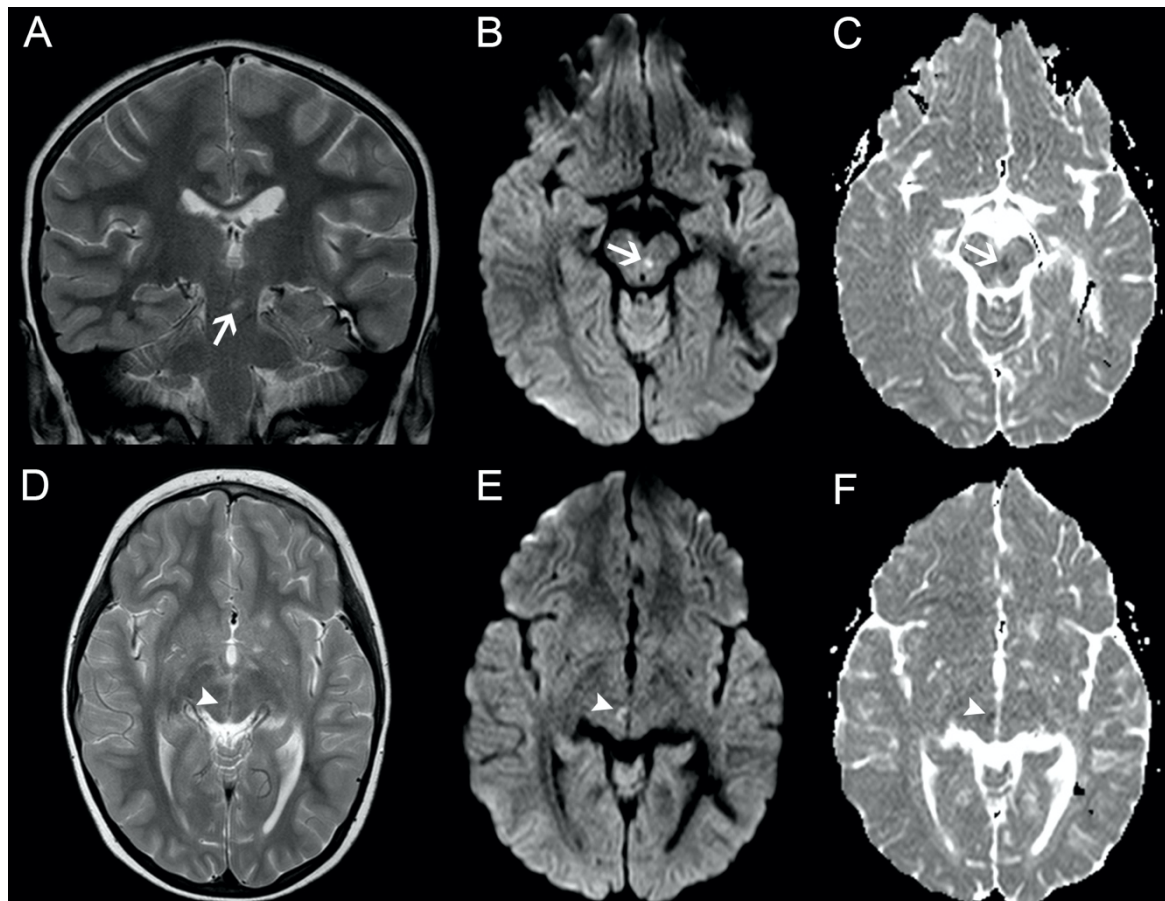

**Online Fig 2.** Acute brain ischemic infarcts in patient #1. Coronal (A) and axial (D) T2WI, axial DWI (B,E) and axial ADC maps (C,F) performed at 8.5 years of age detect two punctiform acute ischemic lesions in the posterior circulation territory, namely in the left mesencephalon (arrows) and right mesencephalic-diencephalic region (arrowheads). At that time, this patient also presented at that time a perivascular enhancing tissue in the interpeduncular fossa (See Fig 2).

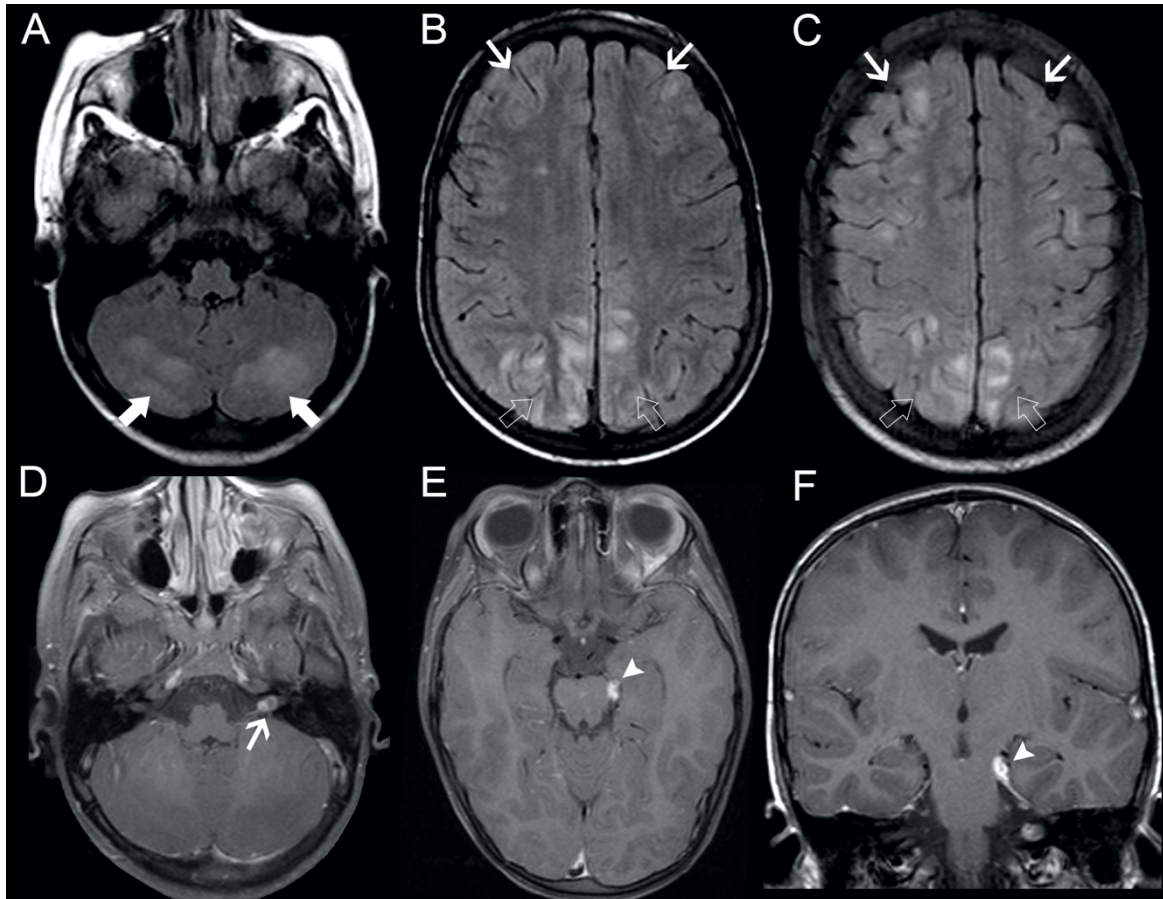

**Online Fig 3.** Posterior encephalopathy reversible syndrome and perivascular enhancing tissue in patient #8. Axial FLAIR images (A-C) performed at 7.6 years of age demonstrate bilateral asymmetric areas of hyperintensity involving the cerebellar hemispheres (thick arrows) as well as the anterior (arrows) and posterior (open arrows) brain watershed regions, in a pattern compatible with posterior reversible encephalopathy syndrome. Also note in the same patient extra-axial foci of enhancement in the inner auditory canal (arrow) and left crural cistern (arrowheads) on post-gadolinium axial fat sat T1WI (D,E) and post-gadolinium coronal TWI (F).

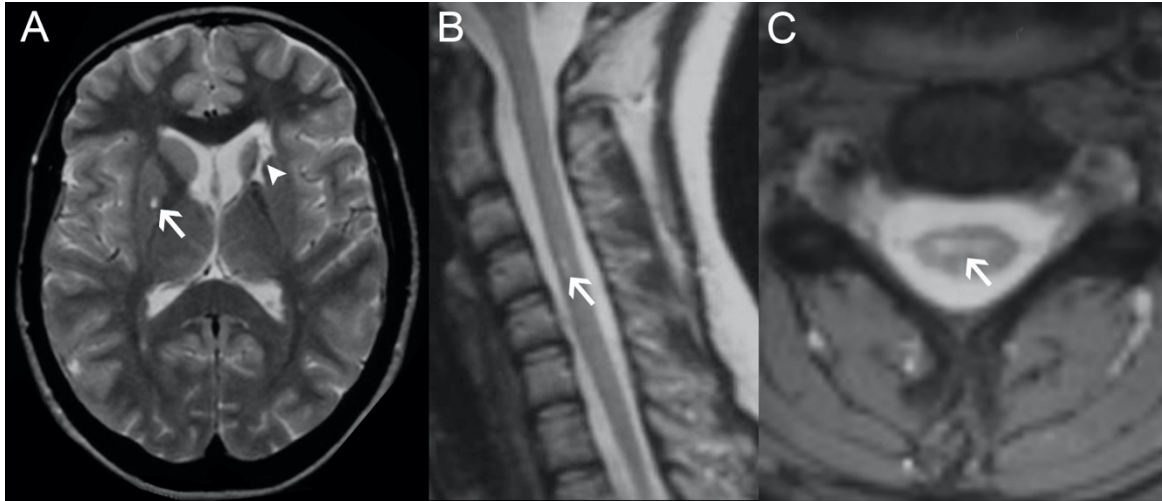

**Online Fig 4.** Chronic brain and medullary ischemic infarcts in patient #6. Brain axial T2WI (A) of patient #6 at 27 years of age depicts small chronic lacunar infarcts in the right putamen (arrow) and left anterior nucleo-capsular region (arrowhead). Sagittal T2WI (B) and axial T2\*WI (C) of the cervical spine of the same patient show a focal hyperintense lesion involving the central gray matter at the level of C4 (arrows), in keeping with a focal ischemic lesion of the spinal cord.

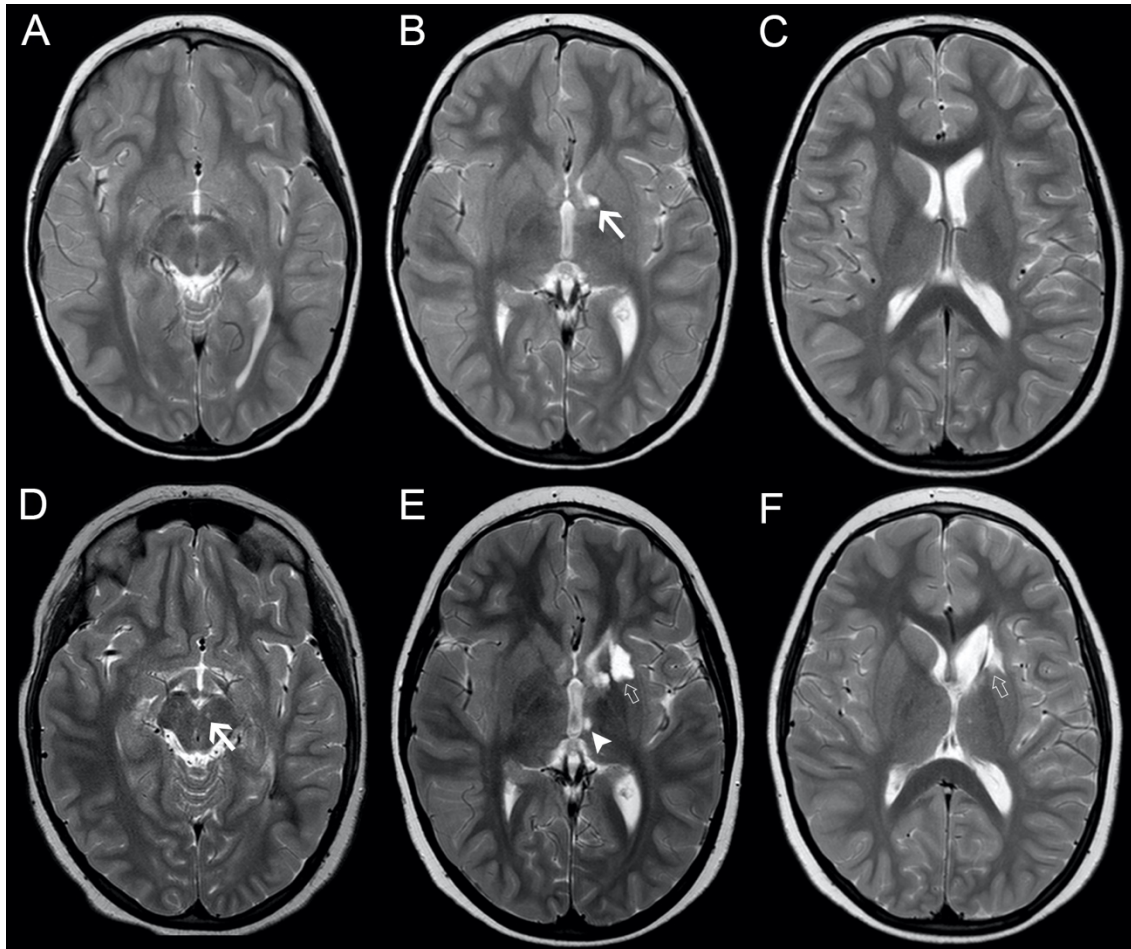

**Online Fig 5.** Accrual of brain ischemic lesions over time in patient #1 before treatment with anti-TNF. Axial T2WI (A-C) at 8.1 years of age show one chronic ischemic lacunar lesion in the left globus pallidus (arrow). Axial T2WI (D-F) of the same patient at 9.7 years of age reveals three additional chronic ischemic lesions, namely in the left mesencephalon (arrow), thalamus (arrowhead) and anterior nucleocapsular region (open arrow).

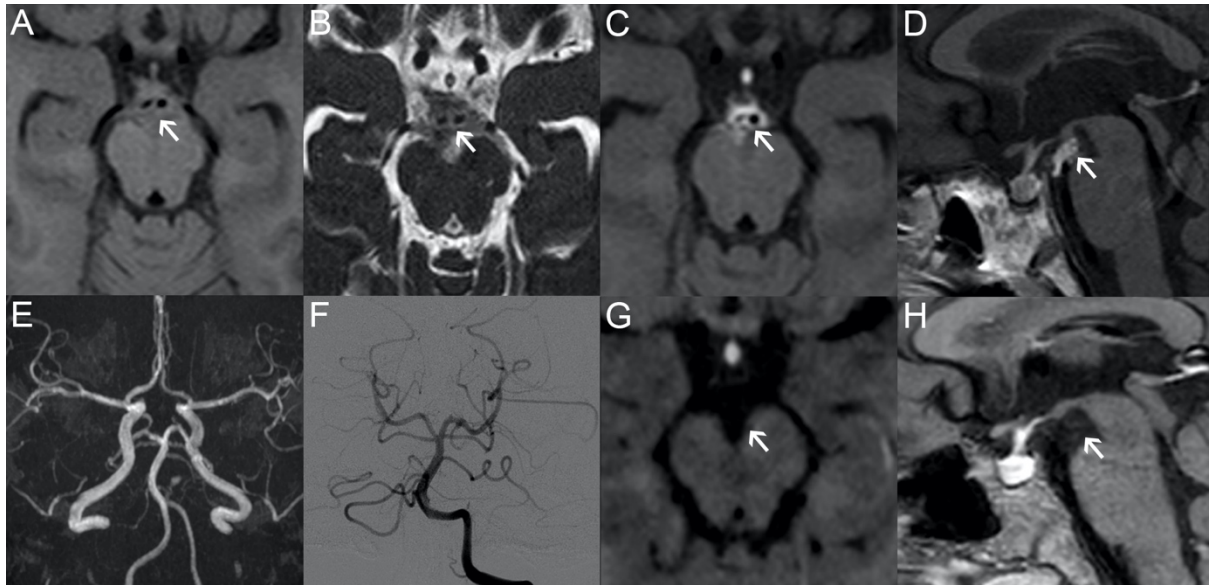

**Online Fig 6.** Longitudinal neuroimaging of deficiency-related perivascular enhancing tissue in patient #4. Brain MRI performed at 5.8 years of age (A-D) demonstrates a soft-tissue component mass in the interpeduncular cistern surrounding the basilar artery and its terminal branches. This component is iso-mildly hyperintense on T1WI (A) (arrow) and its extension is better delineated on 3D driven equilibrium (DRIVE) images (B) (arrow). There is intense solid enhancement on post-gadolinium axial (C) and sagittal (D) T1WI images, with concentric vessel wall involvement (arrows). Time-of-flight MRA (E) and DSA (F) do not depict abnormal vessels in the corresponding location. Axial (G) and sagittal (H) black blood vessel wall imaging performed at 10.8 years of age after introduction of anti-TNF treatment, show complete resolution of this tissue (arrows).
